# Supplementary material for: A new picture of cell wall protein dynamics in elongating cells of Arabidopsis thaliana: Confirmed actors and newcomers
Source: PubMed Central journal article supplement (PMC2551616; doi:10.1186/1471-2229-8-94), 2008-09-16
Supplement: 1471-2229-8-94-S3.pdf [file 1471-2229-8-94-S3.pdf]

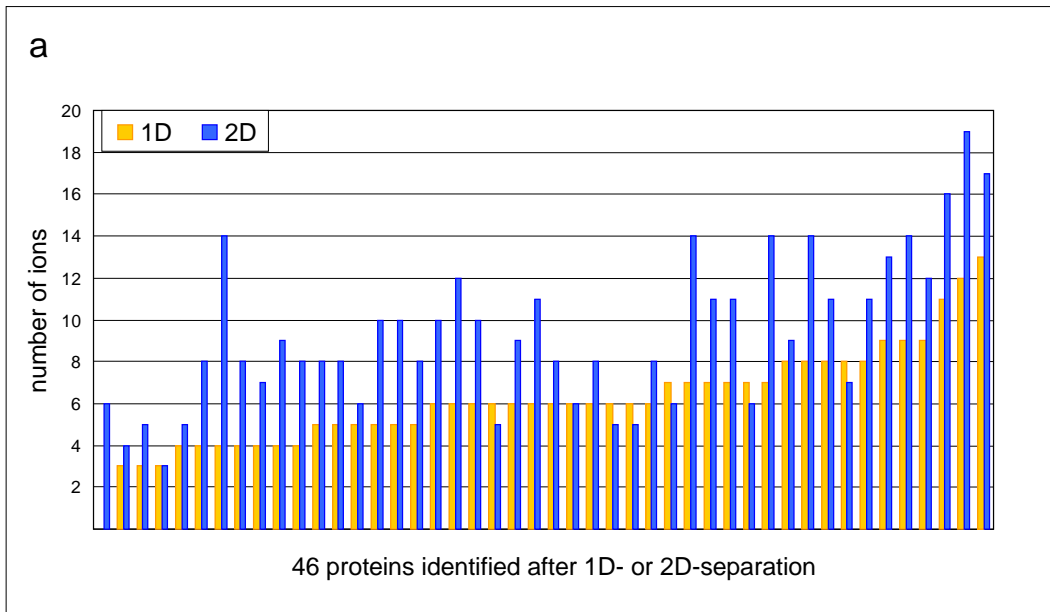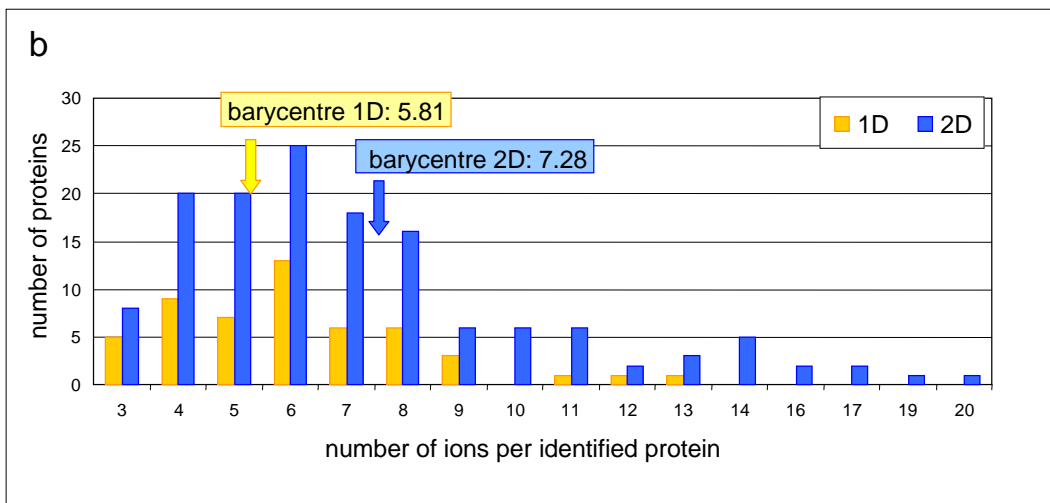

### Additional data file 3

**Identification of proteins extracted by CaCl<sub>2</sub> and LiCl from the cell wall fraction prepared from 5-day-old etiolated hypocotyls by MALDI-TOF MS. a.** Improvement of efficiency of protein identification after 2D-separation of proteins. Numbers of ions found for identification of proteins after 1D- (yellow bars) and 2D- (blue bars) separation are shown. Note that only 6 out of 46 proteins are identified with less ions after 1D- than after 2D-separation. **b.** Increase in number of ions for protein identification after 2D-separation of proteins. Numbers of proteins identified with 3 to 20 ions are shown after 1D-(yellow bars) and 2D- (blue bars) separation. Note that the barycentre of this number of ions used for successful identification is higher after 2D- than after 1D-separation.
